# Supplementary material for: High-Fat-Diet-Induced Obesity Produces Spontaneous Ventricular Arrhythmias and Increases the Activity of Ryanodine Receptors in Mice
Source: MDPI journal article supplement (doi:10.3390/ijms19020533), 2018-02-10
Supplement: s1 [file s1]

**Table S1.** Effect of HFD on Body Weight, Glycemia, plasma Triglycerides and total plasma Cholesterol.

|                         | <b>Control</b>    | <b>HFD</b>          | <b>Control + Apo</b> | <b>HFD + Apo</b>   |
|-------------------------|-------------------|---------------------|----------------------|--------------------|
| Body Weight, g          | 23.5 ± 1.0 (11)   | 31.6 ± 1.9 * (12)   | 24.2 ± 1.4 (7)       | 29.5 ± 2.7 * (9)   |
| Glycemia g/dL           | 133.8 ± 20.2 (11) | 215.2 ± 49.5 * (12) | 152.8 ± 10.8 (7)     | 212.8 ± 48.2 (9)   |
| Triglycerides mg/dL     | 70.0 ± 15.5 (6)   | 78.3 ± 15.3 (6)     | 61.3 ± 5.6 (6)       | 68.5 ± 11.5 (6)    |
| Total Cholesterol mg/dL | 75.3 ± 14.6 (6)   | 117.6 ± 6.8 * (6)   | 82.4 ± 11.1 (6)      | 95.9 ± 6.2 * # (6) |

Values are the Mean ± SD of the indicated number of mice and were obtained after 6 h of fasting. \*  $p < 0.05$ , compared to control; #  $p < 0.05$ , compared to HFD. Determinations were made with enzymatic colorimetric tests from Human, Wiesbaden-Germany.
